# Supplementary material for: The oak gene expression atlas: insights into Fagaceae genome evolution and the discovery of genes regulated during bud dormancy release
Source: PubMed Central journal article supplement (PMC4350297; doi:10.1186/s12864-015-1331-9), 2015-02-21
Supplement: 12864_2015_1331_MOESM3_ESM.pdf [file 12864_2015_1331_MOESM3_ESM.pdf]

Number of sequences

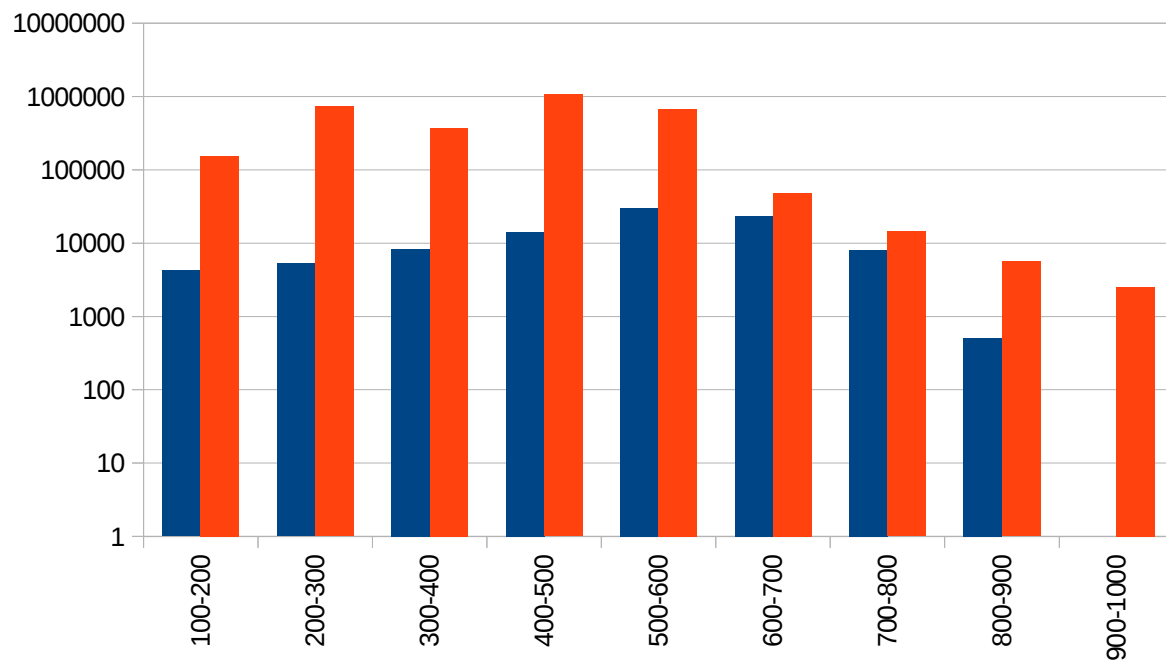

Trimmed sequence lengths
